# Supplementary material
Source: PubMed Central journal article supplement (PMC3501051)
Supplement: supp_M112.378109_jbc.M112.378109-1.pdf [file supp_M112.378109_jbc.M112.378109-1.pdf]

## Supplemental Table I

### Plasmids used in this study

| Plasmids                                                                           | Description                                                                                                                                    | Source                            |
|------------------------------------------------------------------------------------|------------------------------------------------------------------------------------------------------------------------------------------------|-----------------------------------|
| <b>Gateway cloning vectors</b>                                                     |                                                                                                                                                |                                   |
| pENTR1A, -2B and -3C                                                               | Gateway entry vectors                                                                                                                          | Invitrogen                        |
| pDest15                                                                            | Bacterial GST fusion expression vector; T7 promoter                                                                                            | Invitrogen                        |
| pDEST-TH1                                                                          | Bacterial MBP fusion expression vector; tac promoter                                                                                           | (1)                               |
| pDestEGFP-C1                                                                       | Mammalian EGFP fusion expression vector; CMV promoter                                                                                          | (2)                               |
| pDest-mCherry-C1                                                                   | Mammalian mCherry fusion expression vector, backbone as pDestEGFP-C1                                                                           | (3)                               |
| pDest-3xFLAG                                                                       | Mammalian triple FLAG-tag fusion expression vector; CMV promoter                                                                               | (4)                               |
| pDest-myc                                                                          | Mammalian myc-tag fusion expression vector; backbone as pcDNA3.1                                                                               | (2)                               |
| pDest53                                                                            | Mammalian GFP fusion expression vector, CMV and T7 promoter                                                                                    | Invitrogen                        |
| pDestEGFP-Flp-In-FRT/TO                                                            | EGFP gene and downstream gateway cassette subcloned from pDestEGFP-C1 into polylinker of pcDNA5/FRT/TO                                         | This study                        |
| <b>Other vectors</b>                                                               |                                                                                                                                                |                                   |
| pGEX-2T                                                                            | Bacterial GST fusion expression vector; tac promoter                                                                                           | Amersham                          |
| pcDNA5/FRT/TO                                                                      | Mammalian Flp-In expression vector; Tet-inducible CMV promoter                                                                                 | Invitrogen                        |
| <b>cDNA constructs made by traditional subcloning or site-directed mutagenesis</b> |                                                                                                                                                |                                   |
| pENTR223.1-ULK1                                                                    | Human ULK1 in Gateway entry vector (HsCD00082595)                                                                                              | DF/HCC DNA Resource Core, Harvard |
| pENTR-ULK1 F357A                                                                   | Made by site-directed mutagenesis of pENTR223.1-ULK1                                                                                           | This study                        |
| pENTR-ULK1 F357A/V360A                                                             | Made by site-directed mutagenesis of pENTR223.1-ULK1                                                                                           | This study                        |
| pENTR-ULK1(1-350)                                                                  | ULK1(1-350) in Gateway entry vector                                                                                                            | This study                        |
| pENTR-ULK1(1-370)                                                                  | ULK1(1-370) in Gateway entry vector                                                                                                            | This study                        |
| pENTR-ULK1(371-1050)                                                               | ULK1(371-1050) in Gateway entry vector                                                                                                         | This study                        |
| pENTR-ULK1(351-400)                                                                | ULK1(351-400) in Gateway entry vector                                                                                                          | This study                        |
| pENTR-ULK1(351-370)                                                                | ULK1(351-370) in Gateway entry vector                                                                                                          | This study                        |
| pENTR-ULK1(351-400) point mutants (F357A, F357A/V360A)                             | Made by site-directed mutagenesis of pENTR-ULK1(351-400)                                                                                       | This study                        |
| pcDNA3.1-ATG13-FLAG                                                                | Human ATG13, C-terminally tagged with FLAG, in pcDNA3.1                                                                                        | (5)                               |
| pENTR-ATG13                                                                        | ATG13 from pcDNA3.1-ATG13-FLAG in Gateway entry vector                                                                                         | This study                        |
| pENTR-ATG13 F444A                                                                  | Made by site-directed mutagenesis of pENTR-ATG13                                                                                               | This study                        |
| pENTR-ATG13 F444A/I447A                                                            | Made by site-directed mutagenesis of pENTR-ATG13                                                                                               | This study                        |
| pENTR-ATG13(1-457)                                                                 | ATG13(1-457) in Gateway entry vector                                                                                                           | This study                        |
| pENTR-ATG13(1-437)                                                                 | ATG13(1-437) in Gateway entry vector                                                                                                           | This study                        |
| pENTR-ATG13(438-517)                                                               | ATG13(438-517) in Gateway entry vector                                                                                                         | This study                        |
| pENTR-ATG13(438-457)                                                               | ATG13(438-457) in Gateway entry vector                                                                                                         | This study                        |
| pENTR-ATG13(458-517)                                                               | ATG13(458-517) in Gateway entry vector                                                                                                         | This study                        |
| pDONR221-FIP200                                                                    | Human FIP200 in Gateway DONR vector (HsCD00044465)                                                                                             | DF/HCC DNA Resource Core, Harvard |
| pENTR-LC3A                                                                         | Human LC3A in Gateway entry vector                                                                                                             | (3)                               |
| pENTR-GABARAP                                                                      | Human GABARAP in Gateway entry vector                                                                                                          | (3)                               |
| pENTR-GABARAP point mutants (K46A, K48A, Y49A, L50A, R67A, F77A)                   | Made by site-directed mutagenesis of pENTR-GABARAP                                                                                             | This study                        |
| pENTR-GABARAP(1-26)                                                                | Human GABARAP(1-26) in Gateway entry vector                                                                                                    | This study                        |
| pENTR-GABARAP(28-117)                                                              | Human GABARAP(28-117) in Gateway entry vector                                                                                                  | This study                        |
| pENTR-GABARAPL1                                                                    | Human0 GABARAPL1 in Gateway entry vector                                                                                                       | (3)                               |
| pDONR221-yAtg1                                                                     | Yeast Atg1 in gateway donor vector (HsCD00025090)                                                                                              | DF/HCC DNA Resource Core, Harvard |
| pDONR201-yAtg8                                                                     | Yeast Atg8 in gateway donor vector (HsCD00011665)                                                                                              | DF/HCC DNA Resource Core, Harvard |
| pUASp-GFP-Atg8A                                                                    | Drosophila Atg8A in pUASp-hrGFP                                                                                                                | (6)                               |
| pENTR-DmAtg8A                                                                      | Drosophila Atg8A from pUASp-GFP-Atg8A in Gateway entry vector                                                                                  | This study                        |
| pDONR221-DmAtg1B                                                                   | Drosophila Atg1B was isolated by PCR using cDNA made from RNA isolated from S2R+ cells, and then inserted into pDONR221 by Gateway BP reaction | This study                        |
| pDONR221-DmAtg1B point mutants (F391A, V394A, F391A/V394A)                         | Made by site-directed mutagenesis of pDONR221-Atg1B                                                                                            | This study                        |
| pENTR-FYCO1(1276-1294)                                                             | Human FYCO1 in Gateway entry vector                                                                                                            | This study                        |
| pGEX4T1-LC3C(ΔG)                                                                   | Human LC3C in pGEX4T1                                                                                                                          | (7)                               |
| pEGFP-C1-LC3C(ΔG)                                                                  | Human LC3C in pEGFP-C1                                                                                                                         | (7)                               |
| <b>cDNA constructs made by Gateway LR reactions</b>                                |                                                                                                                                                |                                   |
| pDest15-ULK1(351-400)                                                              | ULK1(351-400) in pDest15                                                                                                                       | This study                        |
| pDest15-ULK1(351-400) F357A                                                        | ULK1(351-400) F357A in pDest15                                                                                                                 | This study                        |
| pDest15-ULK1(351-400) F357A/V360A                                                  | ULK1(351-400) F357A/V360A in pDest15                                                                                                           | This study                        |

|                                          |                                                   |            |
|------------------------------------------|---------------------------------------------------|------------|
| pDest15-ATG13                            | ATG13 in pDest15                                  | This study |
| pDest15-LC3A                             | LC3A in pDest15                                   | (3)        |
| pDest15-LC3B                             | LC3B in pDest15                                   | (3)        |
| pDest15-GABARAP                          | GABARAP in pDest15                                | (3)        |
| pDest15-GABARAPL1                        | GABARAPL1 in pDest15                              | (3)        |
| pDest15-GABARAPL2                        | GABARAPL2 in pDest15                              | (3)        |
| pDest15-GABARAP(1-26)                    | GABARAP(1-26) in pDest15                          | This study |
| pDest15-GABARAP(28-117)                  | GABARAP(28-117) in pDest15                        | This study |
| pDest15-yAtg8                            | Yeast Atg8 in pDest15                             | This study |
| pDest15-DmAtg8A                          | Drosophila Atg8A in pDest15                       | This study |
| pDest15-GABARAP K46A                     | GABARAP K46A in pDest15                           | This study |
| pDest15-GABARAP K48A                     | GABARAP K48A in pDest15                           | This study |
| pDest15-GABARAP Y49A                     | GABARAP Y49A in pDest15                           | This study |
| pDest15-GABARAP L50A                     | GABARAP L50A in pDest15                           | This study |
| pDest15-GABARAP R67A                     | GABARAP R67A in pDest15                           | This study |
| pDest15-GABARAP F77A                     | GABARAP F77A in pDest15                           | This study |
| pDest-TH1-GABARAP                        | GABARAP in pDest-TH1                              | This study |
| pDestEGFP-LC3A                           | LC3A in pDestEGFP-C1                              | This study |
| pDestEGFP-LC3B                           | LC3B in pDestEGFP-C1                              | (7)        |
| pDestEGFP-GABARAP                        | GABARAP in pDestEGFP-C1                           | This study |
| pDestEGFP-GABARAPL1                      | GABARAPL1 in pDestEGFP-C1                         | This study |
| pDestEGFP-GABARAPL2                      | GABARAPL2 in pDestEGFP-C1                         | (7)        |
| pDest-3xFLAG-ULK1                        | ULK1 in pDest-3xFLAG                              | This study |
| pDest-3xFLAG-ULK1 F357A/V360A            | ULK1 F357A/V360A in pDest-3xFLAG                  | This study |
| pDest-3xFLAG-GABARAP                     | GABARAP in pDest-3xFLAG                           | This study |
| pDest-mCherry-ULK1                       | ULK1 in pDest-mCherry                             | This study |
| pDest-mCherry-ULK1 F357A/V360A           | ULK1 F357A/V360A in pDest-mCherry                 | This study |
| pDest-myc-ULK1                           | ULK1 in pDest-myc                                 | This study |
| pDest-myc-ULK1(1-370)                    | ULK1(1-370) in pDest-myc                          | This study |
| pDest-myc-ULK1(371-1050)                 | ULK1(371-1050) in pDest-myc                       | This study |
| pDest-myc-ULK1 F357A                     | ULK1 F357A in pDest-myc                           | This study |
| pDest-myc-ULK1 F357A/V360A               | ULK1 F357A/V360A in pDest-myc                     | This study |
| pDest-myc-ATG13                          | ATG13 in pDest-myc                                | This study |
| pDest-myc-FIP200                         | FIP200 in pDest-myc                               | This study |
| pDest-myc-yAtg1                          | Yeast Atg1 in pDest-myc                           | This study |
| pDest-myc-DmAtg1B                        | Drosophila Atg1B in pDest-myc                     | This study |
| pDest-myc-DmAtg1B F391A                  | Drosophila Atg1B F391A in pDest-myc               | This study |
| pDest-myc-DmAtg1B V394A                  | Drosophila Atg1B V394A in pDest-myc               | This study |
| pDest-myc-DmAtg1B F391A/V394A            | Drosophila Atg1B F391A/V394A in pDest-myc         | This study |
| pDest53-ULK1(1-350)                      | ULK1(1-350) in pDest53                            | This study |
| pDest53-ULK1(351-400)                    | ULK1(351-400) in pDest53                          | This study |
| pDest53-ULK1(351-370)                    | ULK1(351-370) in pDest53                          | This study |
| pDest53-ATG13                            | ATG13 in pDest53                                  | This study |
| pDest53-ATG13(1-457)                     | ATG13(1-457) in pDest53                           | This study |
| pDest53-ATG13(1-437)                     | ATG13(1-437) in pDest53                           | This study |
| pDest53-ATG13(438-517)                   | ATG13(438-517) in pDest53                         | This study |
| pDest53-ATG13(438-457)                   | ATG13(438-457) in pDest53                         | This study |
| pDest53-ATG13(458-517)                   | ATG13(458-517) in pDest53                         | This study |
| pDest53-ATG13 F444A                      | ATG13 F444A in pDest53                            | This study |
| pDest53-ATG13 F444A/I447A                | ATG13 F444A/I447A in pDest53                      | This study |
| pDest53-GABARAP                          | GABARAP in pDest53                                | This study |
| pDest53-FYCO1(1276-1294)                 | Human FYCO1 LIR motif in pDest53                  | This study |
| pDest53-p62(321-349)                     | Human p62 LIR motif in pDest53                    | (3)        |
| pDestEGFP-Flp-In-FRT/TO-ULK1             | Human ULK1 in pDestEGFP-Flp-In-FRT/TO             | This study |
| pDestEGFP-Flp-In-FRT/TO-ULK1 F357A/V360A | Human ULK1 F357A/V360A in pDestEGFP-Flp-In-FRT/TO | This study |

## References

1. Hammarstrom, M., Hellgren, N., van Den Berg, S., Berglund, H., and Hard, T. (2002) *Protein Sci* **11**, 313-321
2. Lamark, T., Perander, M., Outzen, H., Kristiansen, K., Øvervatn, A., Michaelsen, E., Bjørkøy, G., and Johansen, T. (2003) *J Biol Chem* **278**, 34568-34581

3. Pankiv, S., Clausen, T. H., Lamark, T., Brech, A., Bruun, J. A., Outzen, H., Overvatn, A., Bjorkoy, G., and Johansen, T. (2007) *J Biol Chem* **282**, 24131-24145
4. Jain, A., Lamark, T., Sjøttem, E., Bowitz Larsen, K., Awuh, J. A., Øvervatn, A., McMahon, M., Hayes, J. D., and Johansen, T. (2010) *J Biol Chem* **285**, 22576-22591
5. Chan, E. Y., Longatti, A., McKnight, N. C., and Tooze, S. A. (2009) *Mol Cell Biol* **29**, 157-171
6. Rusten, T. E., Vaccari, T., Lindmo, K., Rodahl, L. M., Nezis, I. P., Sem-Jacobsen, C., Wendler, F., Vincent, J. P., Brech, A., Bilder, D., and Stenmark, H. (2007) *Curr Biol* **17**, 1817-1825
7. Kirkin, V., Lamark, T., Sou, Y. S., Bjorkoy, G., Nunn, J. L., Bruun, J. A., Shvets, E., McEwan, D. G., Clausen, T. H., Wild, P., Bilusic, I., Theurillat, J. P., Overvatn, A., Ishii, T., Elazar, Z., Komatsu, M., Dikic, I., and Johansen, T. (2009) *Mol Cell* **33**, 505-516

## Supplemental Figure 1

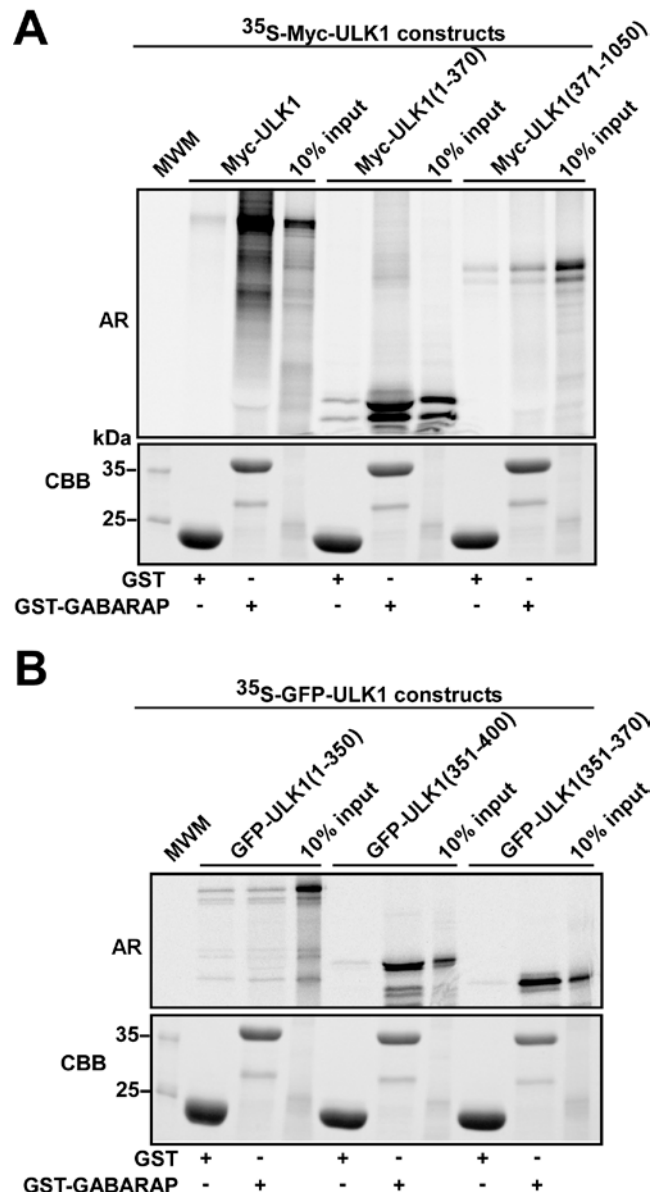

**Supplemental Figure 1.** Amino acids 351-370 of ULK1 are required for GABARAP binding. (A) and (B). The indicated ULK1 constructs were *in vitro* translated in the presence of [<sup>35</sup>S]methionine and tested in GST pull-down assays for binding to recombinant GST or GST-GABARAP. Autoradiographs (AR, upper panels) and Coomassie staining of immobilized GST or GST fusion proteins (bottom panels) are shown.

## Supplemental Figure 2

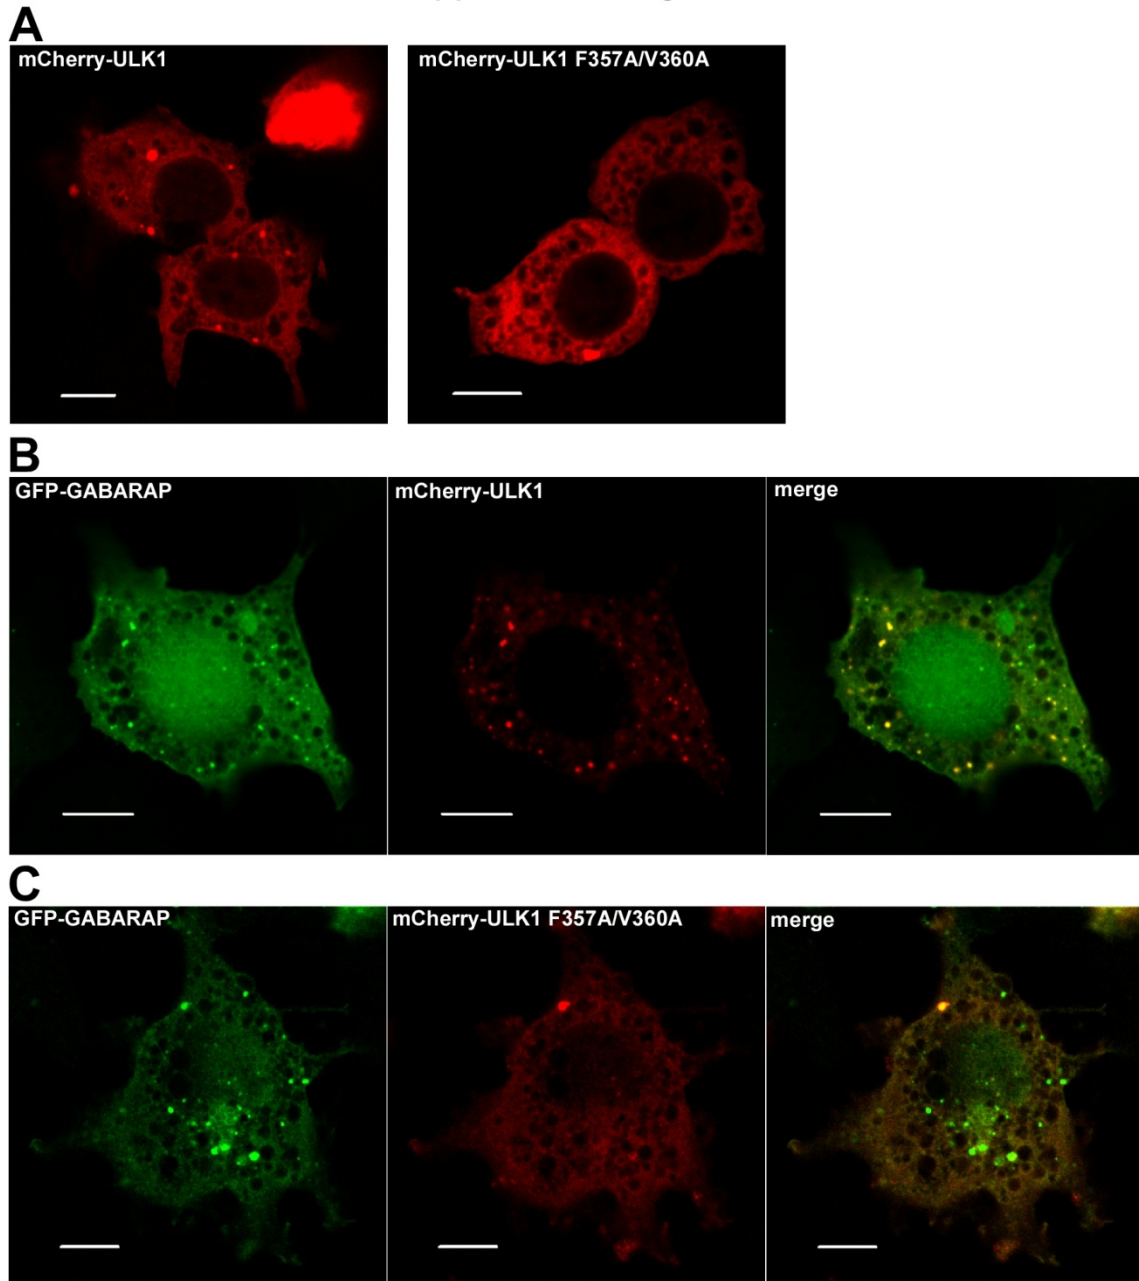

**Supplemental Figure 2.** The LIR motif in ULK1 is needed for efficient co-localisation of overexpressed ULK1 with GABARAP in co-transfected cells. (A-C). HEK293 cells were transfected with mCherry-tagged ULK1 (wild-type or F357/V360 point mutations), either alone (A) or together with GFP-tagged GABARAP (B and C). Cells were analyzed by confocal microscopy 24 h after transfection. Bars, 10  $\mu$ m.

### Supplemental Figure 3

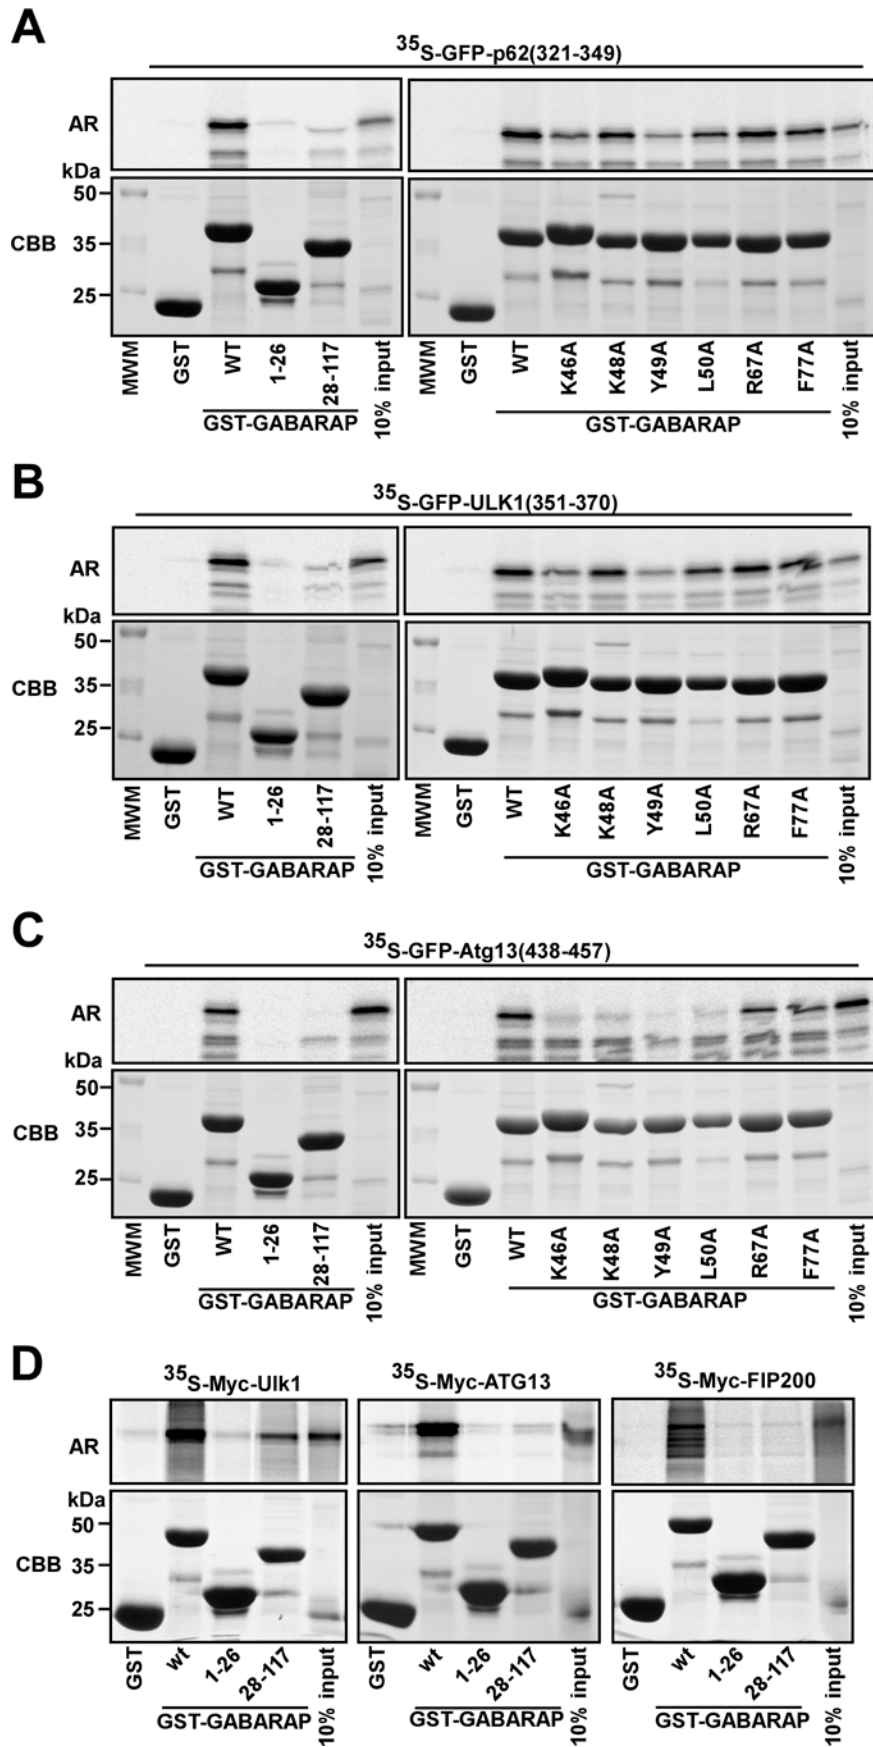

**Supplemental Figure 3.** The interaction of GABARAP with ULK1, ATG13, and FIP200 involve both the C-terminal ubiquitin-like domain and the N-terminal extensions. **(A-C)**. GFP fusions of the indicated LIR motifs from p62, ULK1, and ATG13 were *in vitro* translated and tested for binding to GST or the indicated GST-GABARAP constructs in GST pulldown assays. **(D)**. Full-length ULK1, ATG13, and FIP200 were *in vitro* translated and tested for binding to GST or the indicated GST-GABARAP constructs in GST pulldown assays. **(A-D)**. Autoradiographs (AR, upper panels) and Coomassie staining of immobilized GST or GST fusion proteins (bottom panels) are shown.

## Supplemental Figure 4

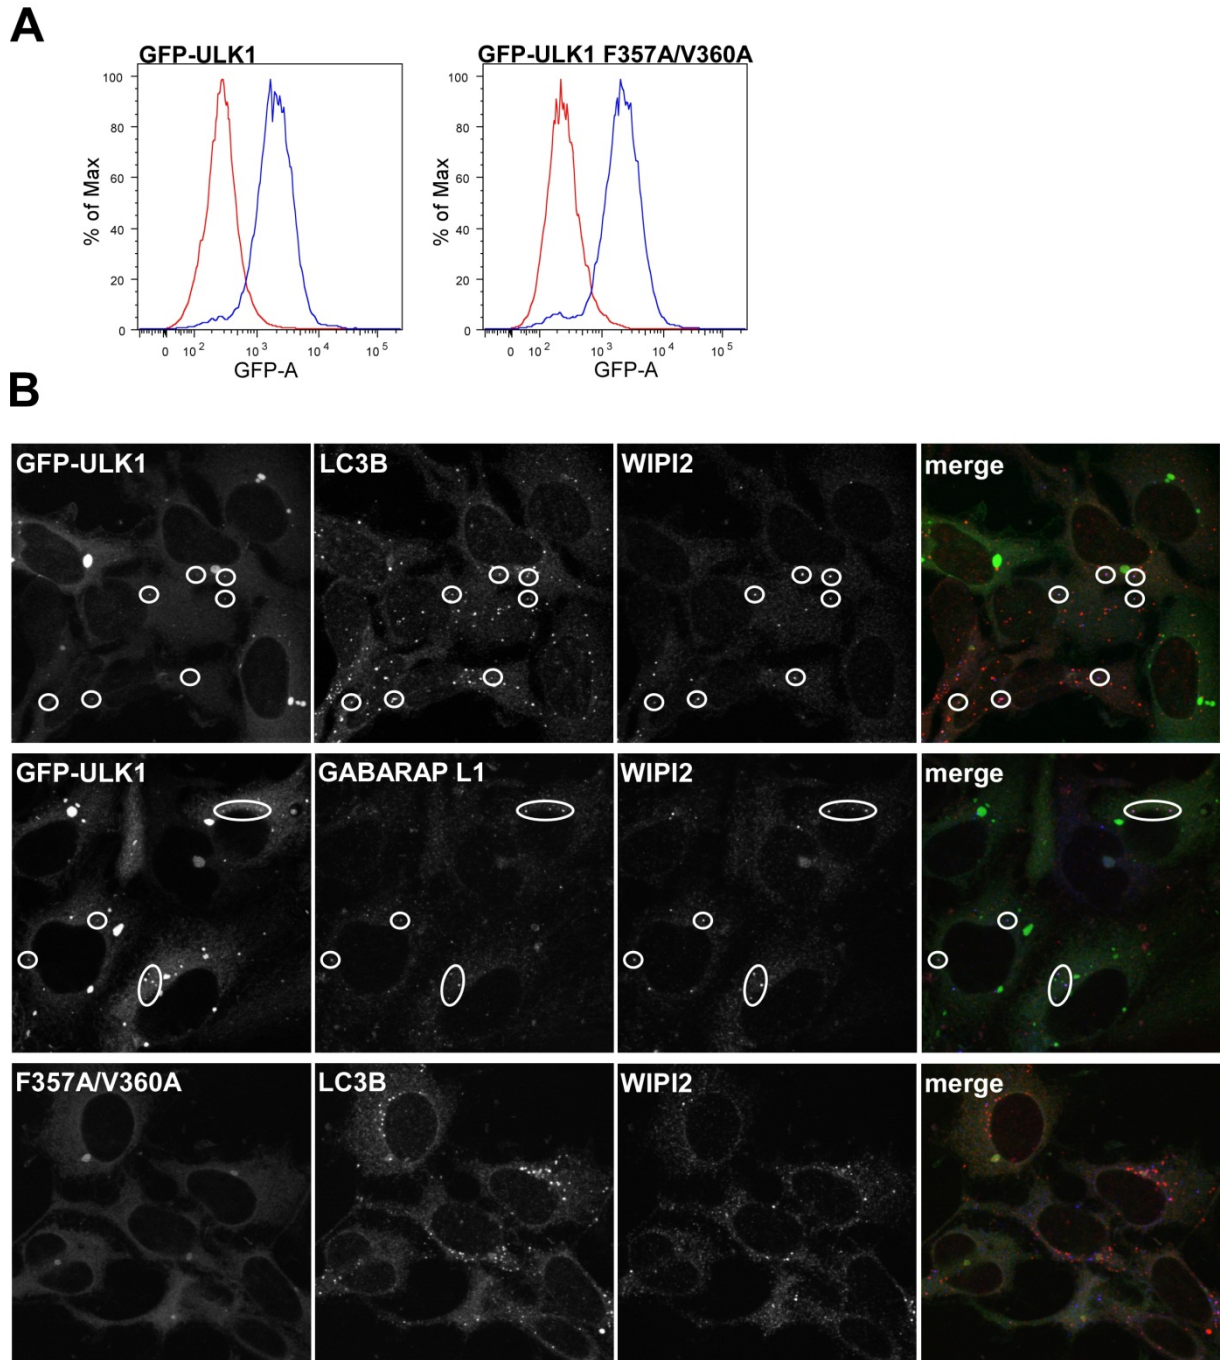

**Supplemental Figure 4.** (A). Flow cytometry diagrams showing equal expression levels of wild type and LIR-mutated GFP-ULK1 in HEK293 Flp-In T-Rex cells. Expression of GFP-ULK1 (wild type or mutated) was induced for 24 hours with tetracycline. (B). Triple co-localization of GFP-ULK1, endogenous WIPI2, and endogenous LC3B or GABARAP L1 in dots of HEK293 Flp-In T-Rex cells expressing wild type GFP-ULK1. Expression of GFP-ULK1 (wild type or mutated) was induced for 24 hours with tetracycline. Cells were fixed and stained as indicated with antibodies against LC3B, GABARAP L1, and WIPI2. Cells were then analysed by confocal microscopy. Representative images are shown, the circles indicating dots with triple co-localization.
